# Supplementary material
Source: publisher site journal article supplement (https://www.dovepress.com/article/357632)
Supplement: Supplementary file 1 [file get_supplementary_file.php]

## 1 **Supplementary material**

### 2 **Trajectory Analysis**

3 Repeated trajectory analyses were performed to identify the latent classes by changing  
4 the number of groups from 2 to 4, with the same starting values calculated from the 1-group  
5 model. According to Muthén & Muthén (2000), there are general criteria for selecting optimal  
6 numbers of latent classes. These criteria include comparing relative fit across models,  
7 examining the "quality" of classification across models, and interpreting usefulness of latent  
8 class trajectories.

9 A large number of fit indices can be used when choosing among models. Examples  
10 include the Akaike information criterion (AIC; Akaike, 1987), consistent AIC (CAIC;  
11 Bozdogan, 1987), Bayesian information criterion (BIC, Schwartz, 1978), the  
12 Lo-Mendell-Rubin likelihood ratio test (LMR; Lo, Mendell, & Rubin, 2001), the bootstrap  
13 parametric likelihood ratio test (BLRT; Muthén, 2006), and the approximation of integrated  
14 classification likelihood using BIC (ICLBIC; Biernacki, Celeux, & Govaert, 2000). Although  
15 all of these fit indices are common (Bauer & Curran, 2003a; Bozdogan, 1987; Jung &  
16 Wickrama, 2008; Nagin, 1999), there are strengths and limitations of each. For example, AIC  
17 tends to overestimate the true number of classes, whereas BIC and CAIC tend to  
18 underestimate (Bauer & Curran, 2003a; McLachlan & Peel, 2000). Furthermore, BIC is  
19 largely insensitive to sample size (D'Unger, Land, McCall, & Nagin, 1998), a possible  
20 strength of the method. The bootstrapped parametric likelihood ratio test, a newer method,  
21 often outperforms alternatives including BIC (Nylund, et al., 2007).

22 Quality of classification across models is measured using entropy (Connell & Frye,  
23 2006). Entropy ranges from 0.0 to 1.0, with values closer to 1.0 representing better  
24 classification. It provides a summary measure of the probability of membership for each  
25 individual for the class the individual most likely belongs to (Connell & Frye, 2006).

26 In this study, KOOS-PS, VAS and EQ-5D-5L scores did not show linear or quadratic  
27 growth trajectories over time (Supplementary Figs 3-5); therefore, the growth mixture  
28 models(GMMs) were fitted in a two-step approach to identify potential heterogeneity of  
29 KOOS-PS, VAS and EQ-5D-5L, where factor loadings of the slope terms, as well as  
30 variances and covariances of continuous latent variables were free estimates across groups. In  
31 addition, the shapes and optimal number of groups were determined by the following criteria:  
32 1) AIC, BIC and aBIC decreased at least 20; 2) Entropy>0.7; 3)% Participants per  
33 class >7.426 4) The p-value of LMR and BLRT are <0.05. Random starts were used to avoid  
34 convergence towards local maxima. The final models were described as

$$35 \quad Y_{it}|C_i = \eta_{0i} + \eta_{1i}\alpha_t + \varepsilon_{it}$$

36 where  $Y_{it}$  is the outcome for individual  $i$  at time  $t$  in latent class  $c$  of the latent class  
37 variable  $C$ ;  $\alpha_t$  are factor loadings, for the recognizability of the models, we set the factor  
38 loadings 7 days after TKA and 1 month after TKA to 0 and 1, respectively, and the factor  
39 loadings at other time points are freely estimated across groups; the random intercepts and  
40 random slopes are expressed as

$$41 \quad \eta_{ji}|C_i=c = \alpha_{jc} + \gamma_{jc}^T \mathbf{X}_i + \xi_{ji}$$

42 where  $j = 0,1$  ;  $X_t$  is a  $q$ -dimensional vector of time-invariant covariates.

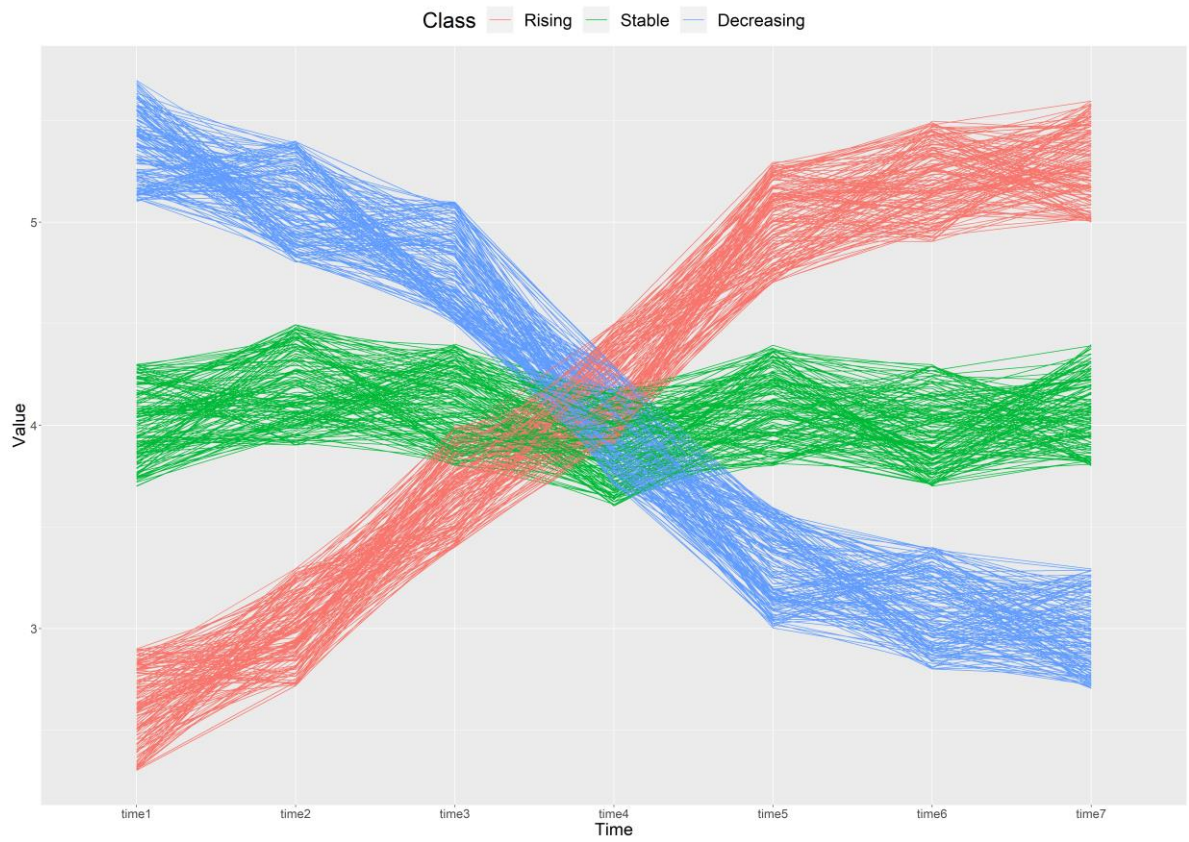

43

44

Figure S1. Schematic diagram of longitudinal data with group heterogeneity

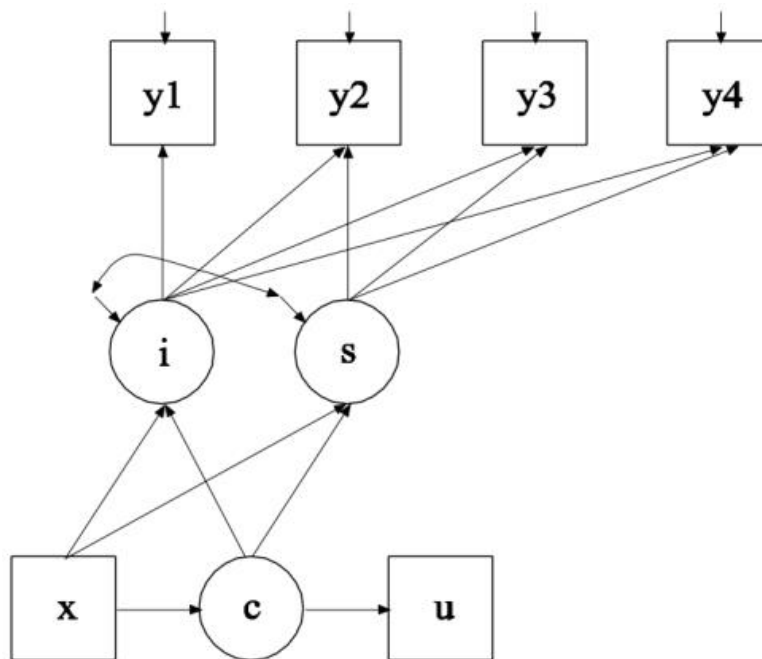

45

46

Figure S2. Schematic diagram of GMM with a categorical distal outcome

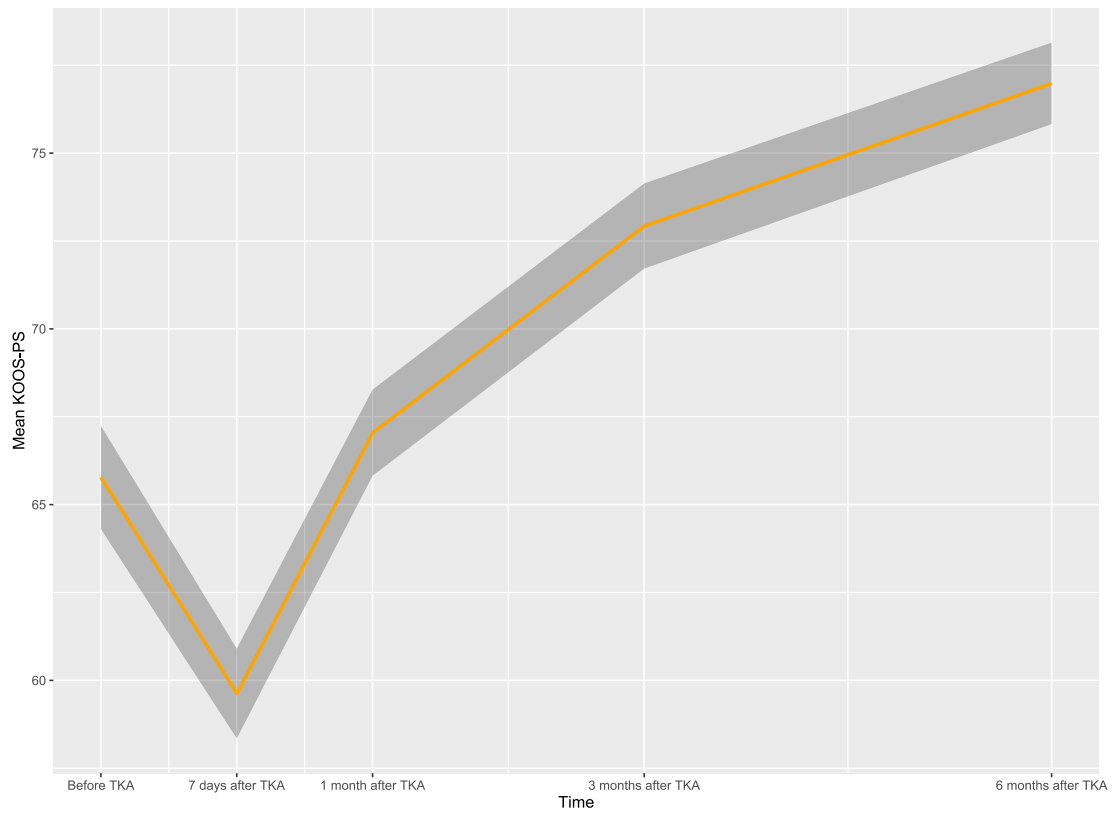

47

**Figure S3.** Mean growth trajectory of KOOS-PS

48

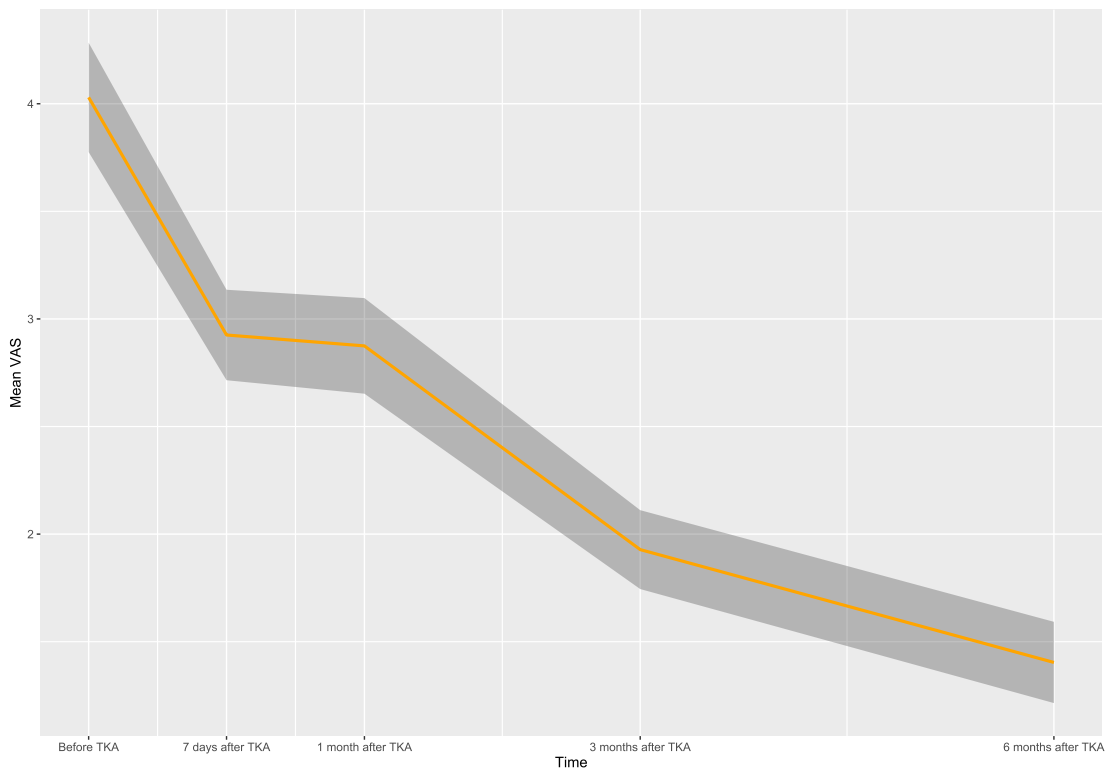

49

**Figure S4.** Mean growth trajectory of VAS

50

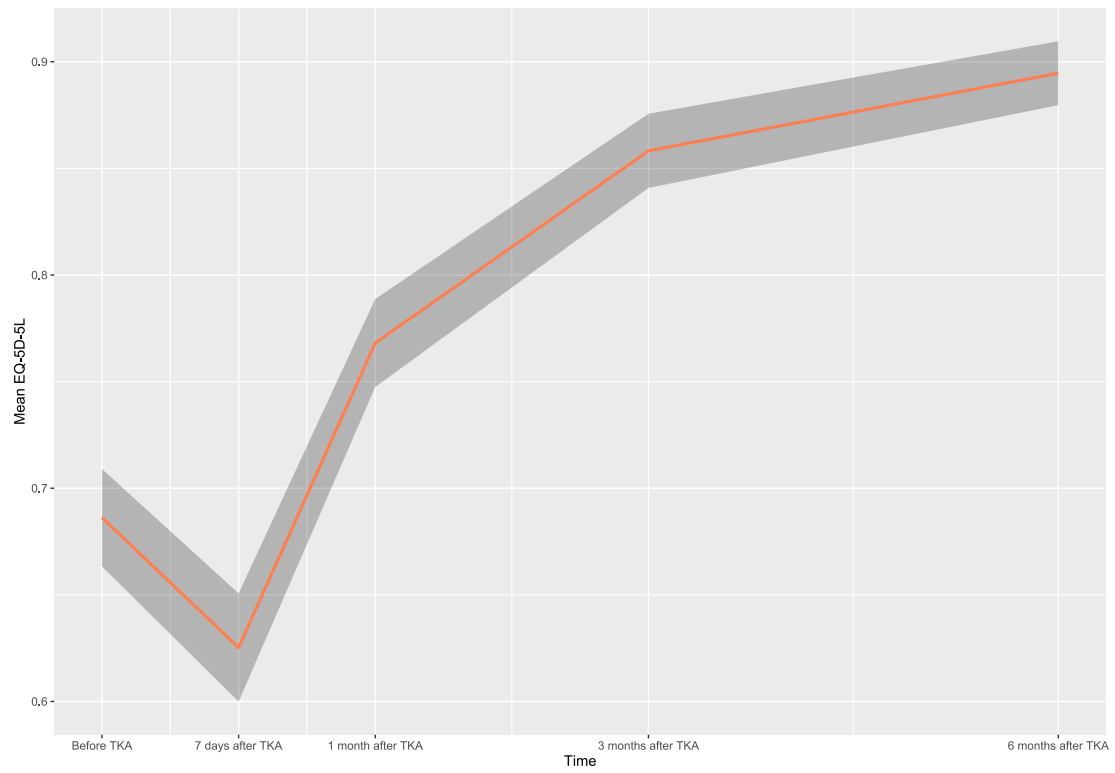

51

52

**Figure S5.** Mean growth trajectory of EQ-5D-5L

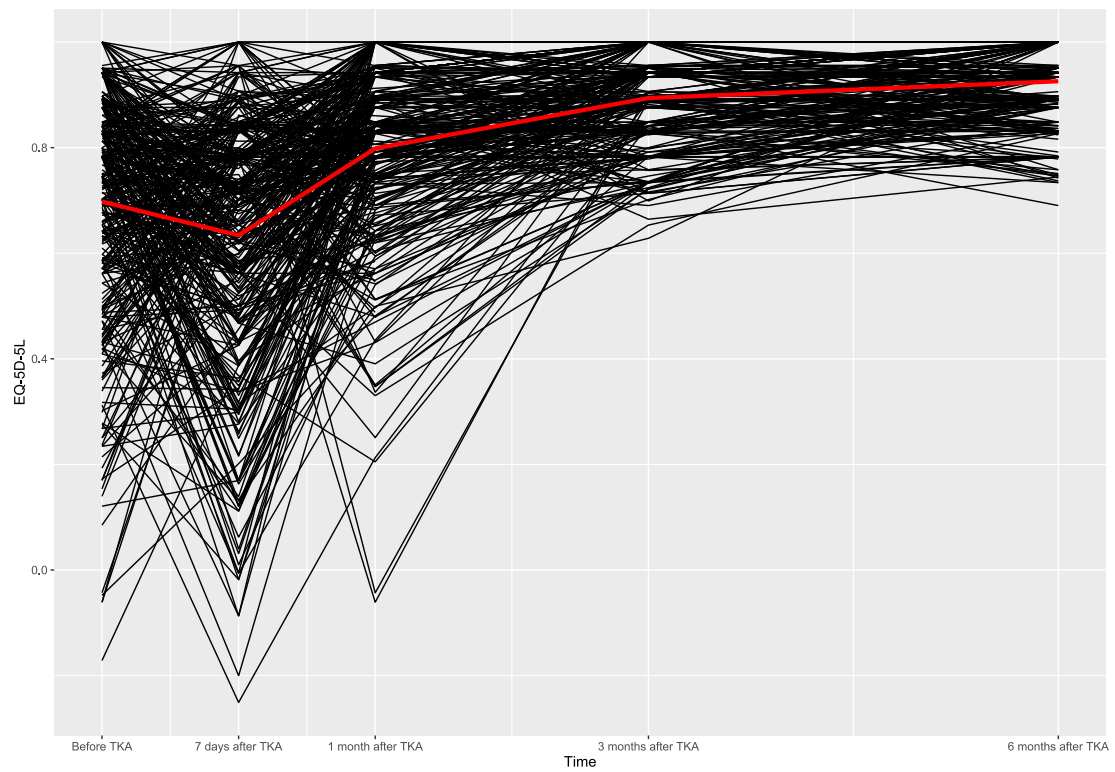

53

54

**Figure S6.** Growth trajectory of the "rising group" of EQ-5D-5L

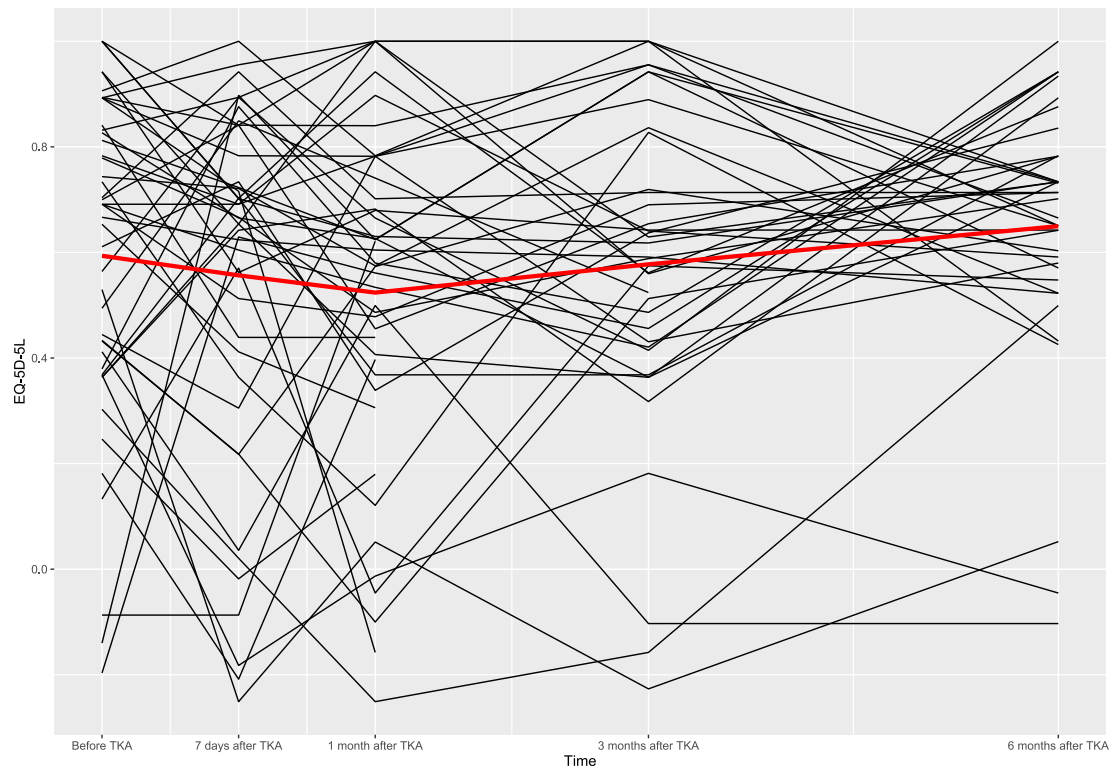

55

56

**Figure S7.** Growth trajectory of the "stable group" of EQ-5D-5L

57

58 **Table S1.** Results of GMM fit statistics with KOOS-PS as dependent variable (unconditional)

| Models         | AIC             | BIC             | aBIC             | Entropy | LMR   | BLRT   | % Participants<br>per class |
|----------------|-----------------|-----------------|------------------|---------|-------|--------|-----------------------------|
| <b>Class-1</b> | <b>14672.85</b> | <b>14724.87</b> | <b>14683.626</b> | -       | -     | -      | -                           |
|                | <b>8</b>        | <b>7</b>        |                  |         |       |        |                             |
| Class-2        | 14577.94        | 14665.97        | 14596.167        | 0.994   | 0.022 | <0.001 | 1.485/98.515                |
|                | 4               | 6               |                  |         |       |        |                             |
| Class-3        | 14526.08        | 14650.12        | 14551.758        | 0.744   | 0.001 | <0.001 | 1.980/23.762/74.            |
|                | 1               | 5               |                  |         |       |        | 257                         |
| Class-4        | 14503.06        | 14663.12        | 14536.199        | 0.597   | 0.214 | 0.333  | 15.842/2.228/25.            |

59 AIC: Akaike information criterion; BIC: the Bayesian information Criterion; aBIC:  
 60 Sample-Size Adjusted BIC; Entropy: Indicator for evaluating classification quality; %  
 61 Participants per class: proportion of participants per class; The best fitting model is  
 62 highlighted in bold characters.

63

64 **Table S2.** Results of GMM fit statistics with Pain-VAS as dependent variable (unconditional)

| Models         | AIC             | BIC             | aBIC            | Entropy      | LMR             | BLRT             | % Participants<br>per class     |
|----------------|-----------------|-----------------|-----------------|--------------|-----------------|------------------|---------------------------------|
| Class-1        | 8049.318        | 8101.336        | 8060.085        | -            | -               | -                | -                               |
| <b>Class-2</b> | <b>7786.911</b> | <b>7874.943</b> | <b>7805.134</b> | <b>0.702</b> | <b>&lt;0.00</b> | <b>&lt;0.001</b> | <b>22.030/77.970</b>            |
|                |                 |                 |                 |              | <b>1</b>        |                  |                                 |
| Class-3        | 7733.279        | 7857.323        | 7758.957        | 0.652        | 0.064           | <0.001           | 27.970/55.446/16<br>.584        |
| Class-4        | 7679.609        | 7839.665        | 7712.741        | 0.796        | 0.296           | 0.326            | 10.644/14.851/14<br>.604/59.901 |

65 AIC: Akaike information criterion; BIC: the Bayesian information Criterion; aBIC:  
 66 Sample-Size Adjusted BIC; Entropy: Indicator for evaluating classification quality; %  
 67 Participants per class: proportion of participants per class; The best fitting model is  
 68 highlighted in bold characters.

69 **Table S3.** Results of GMM fit statistics with EQ-5D-5L as dependent variable (with  
70 KOOS-PS\_I, KOOS-PS\_S and VAS\_C as covariates)

| Models         | AIC              | BIC              | aBIC             | Entropy      | LMR             | BLRT             | % Participants<br>per class    |
|----------------|------------------|------------------|------------------|--------------|-----------------|------------------|--------------------------------|
| Class-1        | -1408.208        | -1356.190        | -1397.440        | -            | -               | -                | -                              |
| <b>Class-2</b> | <b>-1719.877</b> | <b>-1591.832</b> | <b>-1693.372</b> | <b>0.841</b> | <b>&lt;0.00</b> | <b>&lt;0.001</b> | <b>11.139/88.861</b>           |
|                |                  |                  |                  | <b>1</b>     |                 |                  |                                |
| Class-3        | -1823.518        | -1635.451        | -1784.587        | 0.868        | 0.059           | <0.001           | 83.811/5.446/10.<br>644        |
| Class-4        | -1920.748        | -1672.661        | -1869.394        | 0.766        | 0.240           | <0.001           | 11.881/44.802/2.<br>723/40.594 |

71 The growth mixture models(GMMs) were fitted in a two-step approach to identify potential  
72 heterogeneity of KOOS-PS, VAS and EQ-5D-5L, where factor loadings of the slope terms, as  
73 well as variances and covariances of continuous latent variables were free estimates across  
74 groups. First, two unconditional GMMs were fitted to KOOS-PS and VAS respectively. Next,  
75 A conditional GMM was fitted to the EQ-5D-5L score; where the KOOS-PS\_I (the intercept  
76 term of KOOS-PS), KOOS-PS\_S (the slope term of KOOS-PS) and VAS\_C(the categorical  
77 latent variable of VAS) from the first step were entered as covariables; AIC: Akaike  
78 information criterion; BIC: the Bayesian information Criterion; aBIC: Sample-Size Adjusted  
79 BIC; Entropy: Indicator for evaluating classification quality; % Participants per class:  
80 proportion of participants per class;The best fitting model is highlighted in bold characters.



**Table S4.** Parameter estimation results for the two class model of EQ-5D-5L

|                             |                      | Estimated | Standard | t-value | p-value |
|-----------------------------|----------------------|-----------|----------|---------|---------|
|                             |                      | value     | error    |         |         |
| <b>Stable group (n=45)</b>  |                      |           |          |         |         |
| Intercept term              | KOOS-PS_I            | 0.021     | 0.004    | 5.779   | <0.001  |
|                             | KOOS-PS_S            | -0.022    | 0.017    | -1.304  | 0.192   |
|                             | VAS_C                | -0.019    | 0.067    | -0.283  | 0.779   |
|                             | Mean residuals       | -0.446    | 0.221    | -2.015  | 0.044   |
|                             | Residual variance    | 0.023     | 0.009    | 2.461   | 0.014   |
| Slope term                  | KOOS-PS_I            | 0.002     | 0.003    | 0.647   | 0.518   |
|                             | KOOS-PS_S            | -0.007    | 0.009    | -0.831  | 0.406   |
|                             | VAS_C                | -0.014    | 0.017    | -0.855  | 0.397   |
|                             | Mean residuals       | -0.103    | 0.182    | -0.569  | 0.569   |
|                             | Residual variance    | 0.003     | 0.008    | 0.330   | 0.742   |
| Residual covariance         | Intercept with slope | 0.000     | 0.004    | -0.035  | 0.972   |
| <b>Rising group (n=359)</b> |                      |           |          |         |         |
| Intercept term              | KOOS-PS_I            | 0.030     | 0.003    | 11.617  | <0.001  |
|                             | KOOS-PS_S            | -0.020    | 0.005    | -4.389  | <0.001  |
|                             | VAS_C                | 0.006     | 0.018    | 0.359   | 0.72    |
|                             | Mean residuals       | -1.012    | 0.149    | -6.776  | <0.001  |
| Slope term                  | KOOS-PS_I            | -0.015    | 0.002    | -7.531  | <0.001  |
|                             | KOOS-PS_S            | 0.020     | 0.004    | 5.197   | <0.001  |

|                            |                      |       |       |        |        |
|----------------------------|----------------------|-------|-------|--------|--------|
|                            | VAS_C                | 0.009 | 0.011 | 0.840  | 0.401  |
|                            | Mean residuals       | 0.955 | 0.121 | 7.920  | <0.001 |
| Residual covariance        | Intercept with slope | 0.002 | 0.002 | 1.194  | 0.232  |
| <b>Logistic regression</b> | KOOS-PS_I            | 0.869 | 0.057 | -2.278 | 0.023  |
|                            | KOOS-PS_S            | 0.590 | 0.084 | -4.906 | <0.001 |
|                            | VAS_C                | 7.389 | 0.336 | 5.952  | <0.001 |

---

82 The correlation coefficient matrix for the latent variables in the rising group is not positive  
83 definite, resulting in negative residual variance estimates, so the residual variance of the  
84 intercept and slope terms in the rising group are not shown in this paper. Logistic regression:  
85 The category latent variables for EQ-5D-5L are the dependent variables (stable group is the  
86 reference group) and KOOS-PS\_I, KOOS-PS\_S and VAS\_C are the independent variables. In  
87 the stable group (n = 45), The factor loadings of the slope term (EQ-5D-5L\_S) at each time  
88 are 0.327, 0, 1, 2.115, and 2.809, respectively. In the rising group (n = 359), the factor  
89 loadings of the slope term (EQ-5D-5L\_S) at each time are 0.487, 0, 1, 1.538, 1.715  
90 respectively.
